# Supplementary material
Source: PubMed Central journal article supplement (PMC3624264)
Supplement: MCB.00858-12_zmb999109897so1.pdf [file MCB.00858-12_zmb999109897so1.pdf]

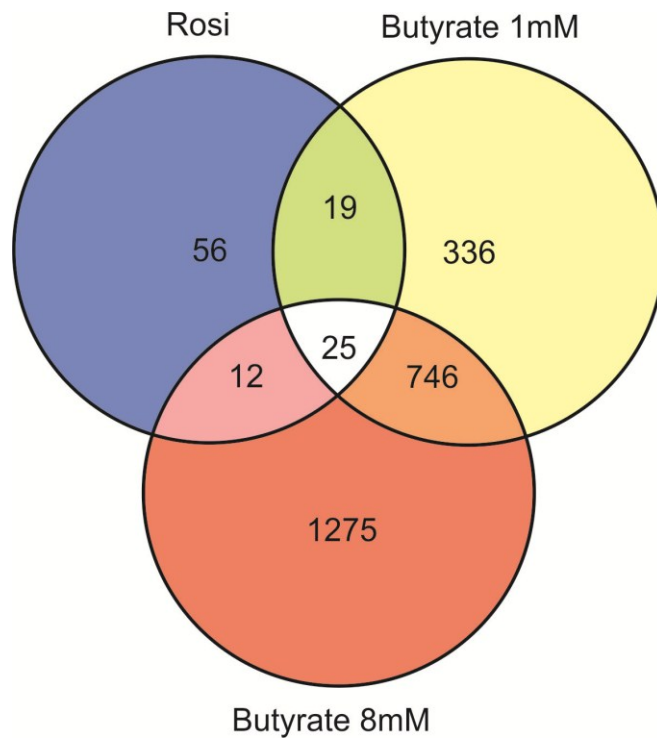

Supplementary Figure 1. Venn diagram showing overlap in gene induction by butyrate (1 mM or 8 mM) and rosiglitazone (1  $\mu$ M) in T84 cells based on Affymetrix microarray analysis. Only genes with signal intensity >20 and number of probesets >10 were included. Threshold for regulation was set at fold change of 1.8.
